# Supplementary material for: Challenges Affecting Access to Health and Social Care Resources and Time Management among Parents of Children with Rett Syndrome: A Qualitative Case Study
Source: PubMed Central journal article supplement (PMC7345745; doi:10.3390/ijerph17124466), 2020-06-21
Supplement: ijerph-17-04466-s001.pdf [file ijerph-17-04466-s001.pdf]

**Supplemental Material Table S1.** Example of Inductive codification process. Theme: Bureaucracy and social care.

| Participant's Narratives                                                                                                                                                                                                                                                                                                                                                                                                                                                                                                                                                                                                                                                                     | Meaningful units                                                                                                                                                                                                                                                                                                        | Meaningful groups                   | Theme                              |
|----------------------------------------------------------------------------------------------------------------------------------------------------------------------------------------------------------------------------------------------------------------------------------------------------------------------------------------------------------------------------------------------------------------------------------------------------------------------------------------------------------------------------------------------------------------------------------------------------------------------------------------------------------------------------------------------|-------------------------------------------------------------------------------------------------------------------------------------------------------------------------------------------------------------------------------------------------------------------------------------------------------------------------|-------------------------------------|------------------------------------|
| <p><i>"It is difficult to avoid bureaucracy, it is mandatory to face it... It is a continuous confrontation, there is no rest... You cannot avoid feeling mistreated or misunderstood, we are forgotten as soon as we leave, we and the needs of our daughters... Bureaucracy is manifested in the position of the official who attends to you, and in my case, it always ends up in arguments..."</i></p> <p><i>"The bureaucratic procedures are exhausting. You have to submit more and more documents and when you think all the papers have been submitted, there is always one missing. Bureaucracy does not take into account our needs, and waiting times are getting longer"</i></p> | <p>Dealing with a lot of bureaucracy</p> <p>Bureaucracy is "a continuous struggle"</p> <p>Feeling forgotten and mistreated</p> <p>Confronted by the official administration employees</p>                                                                                                                               | <p>Fighting bureaucracy</p>         | <p>Bureaucracy and social care</p> |
| <p><i>"Of course we felt the crisis. In the following years we saw many grants reduced or cancelled from public funds. Do you know who took advantage of this? The private centers, covering that gap with the famous early intervention centers. Many families can't afford to pay for the cost of their therapies."</i></p> <p><i>"The cost of health care is very high and we hardly have any help for our children's therapies anymore... It is normal that private centers charge for their services, but there should be more help to be able to afford it".</i></p>                                                                                                                   | <p>A change after the economic crisis</p> <p>Public aids have been reduced and private entities replace the public services</p> <p>Unable to afford private services</p> <p>Early intervention centers charge for their services</p> <p>Parents cannot access early intervention</p> <p>Home care is very expensive</p> | <p>Privatization of social care</p> |                                    |

**Supplemental Material Table S2.** Demographic and clinical features of the family participants.

| Family Code | Participant Code | Age (years) | Gender of participant | Number of children with RS | Age (years) of child with RS | Gender of child with RS | Age (months) when first symptoms were identified | Age (years/months) at diagnosis |
|-------------|------------------|-------------|-----------------------|----------------------------|------------------------------|-------------------------|--------------------------------------------------|---------------------------------|
| FAM1        | P1               | 63          | Female                | 1                          | 4                            | Female                  | 12                                               | 2y                              |
|             | P2               | 33          | Female                |                            |                              |                         |                                                  |                                 |
|             | P3               | 35          | Male                  |                            |                              |                         |                                                  |                                 |
| FAM2        | P4               | 45          | Female                | 1                          | 9                            | Female                  | 15                                               | 2y                              |
|             | P5               | 48          | Male                  |                            |                              |                         |                                                  |                                 |
| FAM3        | P6               | 38          | Female                | 1                          | 6                            | Female                  | 12                                               | 3y 10m                          |
|             | P7               | 43          | Male                  |                            |                              |                         |                                                  |                                 |
| FAM4        | P8               | 45          | Female                | 1                          | 11                           | Male                    | 3                                                | 3y                              |

P9 46 Male

|       |     |    |        |   |    |        |                            |       |
|-------|-----|----|--------|---|----|--------|----------------------------|-------|
| FAM5  | P10 | 42 | Female | 1 | 5  | Male   | 9                          | 2y 6m |
| FAM6  | P11 | 46 | Female | 1 | 11 | Male   | At birth<br>(microcephaly) | 10y   |
|       | P12 | 49 | Male   |   |    |        |                            |       |
| FAM7  | P13 | 37 | Female | 1 | 12 | Male   | 4                          | 7y    |
|       | P14 | 42 | Male   |   |    |        |                            |       |
| FAM8  | P15 | 46 | Female | 1 | 14 | Male   | At birth<br>(microcephaly) | 8y    |
|       | P16 | 48 | Male   |   |    |        |                            |       |
| FAM9  | P17 | 41 | Male   | 1 | 5  | Female | 10                         | 1y 8m |
|       | P18 | 36 | Female |   |    |        |                            |       |
| FAM10 | P19 | 39 | Male   | 1 | 12 | Female | Prenatal<br>detection      | 3y    |
|       | P20 | 36 | Female |   |    |        |                            |       |
| FAM11 | P21 | 55 | Female | 1 | 16 | Female | 14                         | 4y    |
| FAM12 | P22 | 63 | Female | 1 | 31 | Female | At birth                   | 4y    |

|       |     |    |        |   |    |        |    |                                   |
|-------|-----|----|--------|---|----|--------|----|-----------------------------------|
|       | P23 | 67 | Male   |   |    |        |    |                                   |
| FAM13 | P24 | 43 | Male   | 1 | 17 | Female | 10 | 2y 6m                             |
| FAM14 | P25 | 67 | Male   | 1 | 38 | Female | 8  | 16y clinical dx<br>22y genetic dx |
|       | P26 | 65 | Female |   |    |        |    |                                   |
| FAM15 | P27 | 53 | Male   | 1 | 19 | Female | 12 | 1y 6m                             |
| FAM16 | P28 | 46 | Male   | 1 | 12 | Female | 12 | 1y 6m                             |
| FAM17 | P29 | 35 | Female | 1 | 7  | Female | 12 | 1y 6m                             |
| FAM18 | P30 | 30 | Female | 1 | 7  | Female | 15 | 1y 6m                             |
| FAM19 | P31 | 25 | Female | 1 | 3  | Female | 12 | 1y 8m                             |

y= years; m= months; dx: diagnosis.
